# Supplementary figures and images for: Lower Metabolic Potential and Impaired Metabolic Flexibility in Human Lymph Node Stromal Cells from Patients with Rheumatoid Arthritis
Source: MDPI journal article supplement (doi:10.3390/cells12010001), 2022-12-20

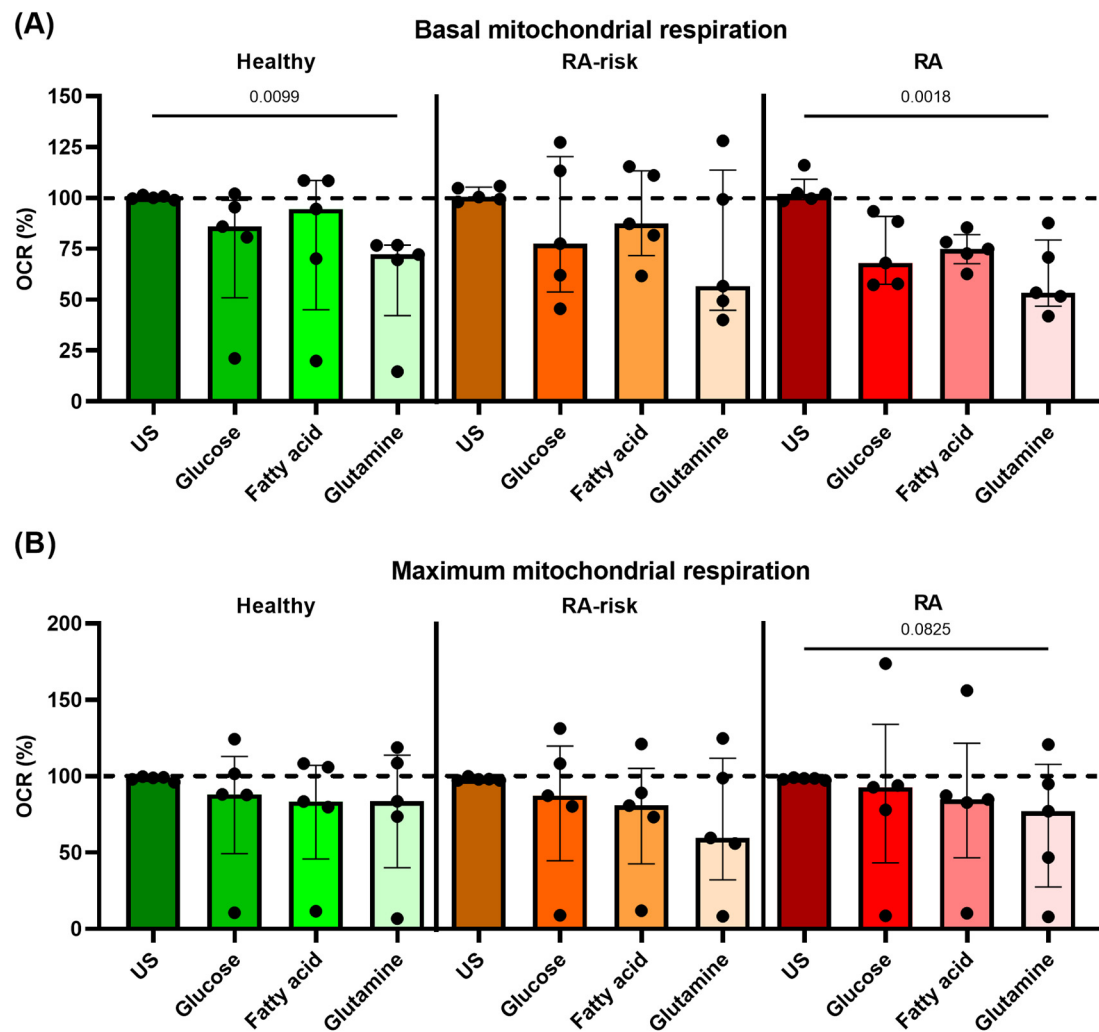

Figure S1. Mitochondrial respiration is most affected upon inhibition of glutamine oxidation.

Supplement: s1 [file s1]
